# Supplementary material for: Integrative Analysis of Whole Genome Sequencing and Phenotypic Resistance Toward Prediction of Trimethoprim-Sulfamethoxazole Resistance in Staphylococcus aureus
Source: PubMed Central journal article supplement (PMC7840696; doi:10.3389/fmicb.2020.607842), 2021-01-14
Supplement: Data_Sheet_1.pdf [file Data_Sheet_1.pdf]

```

dfrG reference MKVSLIAAMDKNRVIGKENDIPWRIPKDWYVKNNTTKGHPIILGRKNLESIGRALPDRRNIILTRDKGFTFNGCEIVHSIEDVFELCKNEBEIFIFGGEQIYNLFFPYVE 110
D1876 dfrG MKVSLIAAMDKNRVIGKENDIPWRIPKDWYVKNNTTKGHPIILGRKNLESIGRALPDRRNIILTRDKGFTFNGCEIVHSIEDVFELCKNEBEIFIFGGEQIYNLFFPYVE 110

dfrG reference KMYITKIHHEFEGDTFFPEVNYYEEWNEVFAQKGIKNDKNPYNYFFHVYERKNLLSX 166
D1876 dfrG KMYITKIHHEFEGDTFFQKX..... 130

```

**Supplementary figure 1.** amino acid sequence of a truncated DHFR<sub>dfrG</sub> (D1876) due to a nucleotide deletion at position 381 of the *dfrG* resulting in a trimethoprim susceptible phenotype.

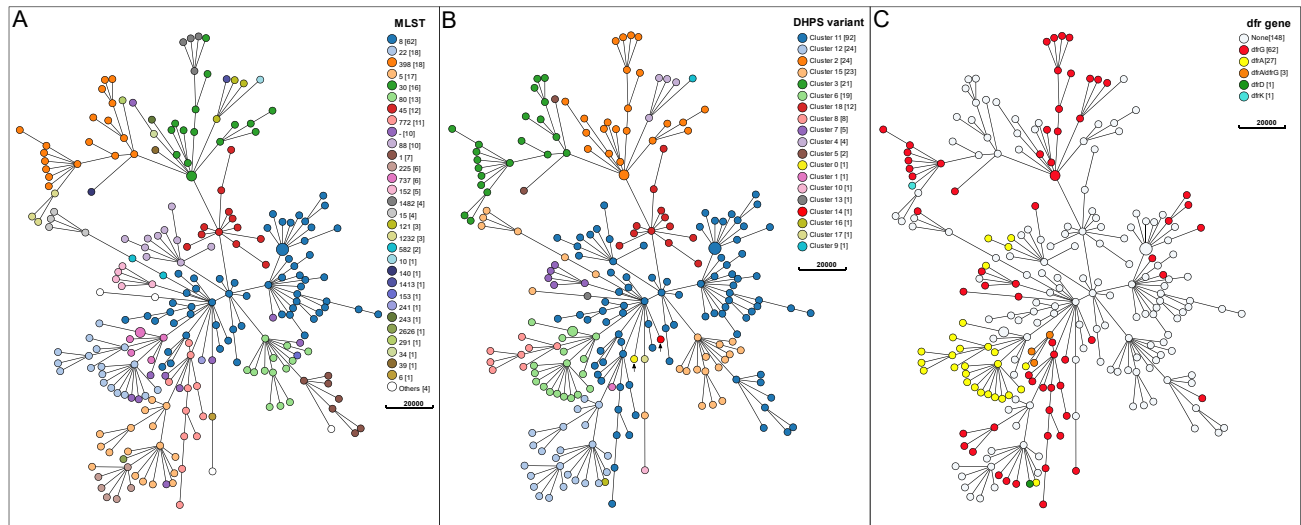

**Supplementary figure 2.** Minimum spanning tree (MST) of our study cohort. The MST is calculated using all 67571 polymorphic sites across the core-genome and with the MSTV” algorithm from the software grapetree. Strains are color-coded based either on A) their MLSTs, B) their DHPS variants, C) their *dfr* genes. The arrows in panel B indicate the two high-level SMZ resistant *S. aureus* isolates harboring the F17L mutation of the chromosomal DHPS.
